# Supplementary material for: Tailoring the adsorption rate of porous chitosan and chitosan–carbon nanotube core–shell beads
Source: Royal Society of Chemistry journal article supplement (doi:10.1039/c4ra04131c), 2014-01-01
Supplement: c4ra04131c1.pdf [file c4ra04131c1.pdf]

# Tailoring the Adsorption Rate of Porous Chitosan and Chitosan-Carbon Nanotube Core-Shell Beads

An Ouyang,<sup>\*ab</sup> Ji Liang<sup>ab</sup>

<sup>a</sup> Department of Mechanical Engineering, Tsinghua University, Beijing 100084, P. R. China

<sup>b</sup> Key Laboratory for Advanced Materials Processing Technology, Ministry of Education, Beijing 100084, P. R. China

\*Corresponding author. Email: [ouyangann@gmail.com](mailto:ouyangann@gmail.com).

## Supporting Information

**Table S1**

**Figure S1**

**Figure S2**

**Table S1. Initial adsorption rates of chitosan and chitosan-SWNT beads for MO and Au nanoparticles**

| Samples             | Static Adsorption                                     | Dynamic Adsorption                                    |         |          |
|---------------------|-------------------------------------------------------|-------------------------------------------------------|---------|----------|
|                     | ( $\text{mg}\cdot\text{g}^{-1}\cdot\text{min}^{-1}$ ) | ( $\text{mg}\cdot\text{g}^{-1}\cdot\text{min}^{-1}$ ) |         |          |
|                     | MO                                                    | MO                                                    | 5 nm Au | 50 nm Au |
| Chitosan beads      | 0.014                                                 | 0.024                                                 | 0.007   | 0.121    |
| Chitosan-SWNT beads | --                                                    | 0.027                                                 | 0.008   | 0.091    |

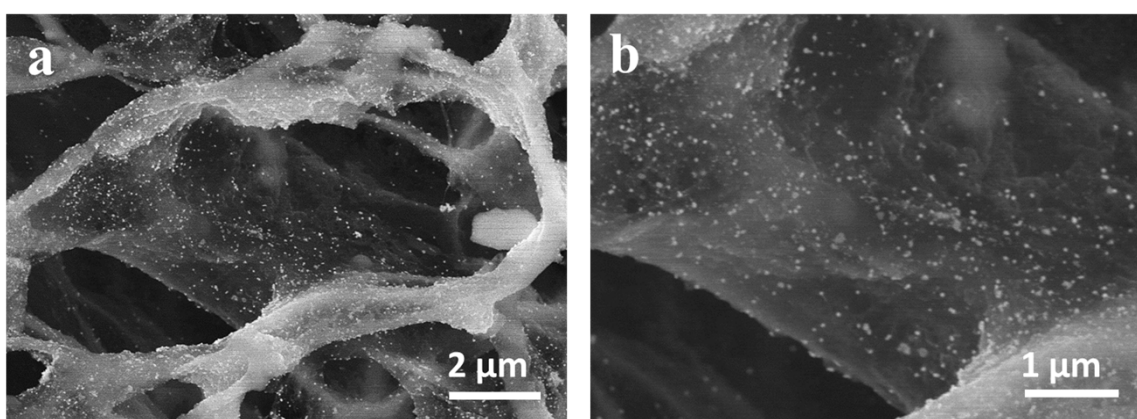

**Figure S1. Characterization of chitosan beads (without a SWNT shell) after adsorption of 50 nm Au nanoparticles.** a) 50 nm Au nanoparticles uniformly adsorbed on the pore walls inside the chitosan bead. b) Enlarged view showing many Au nanoparticles adsorbed on the pore walls.

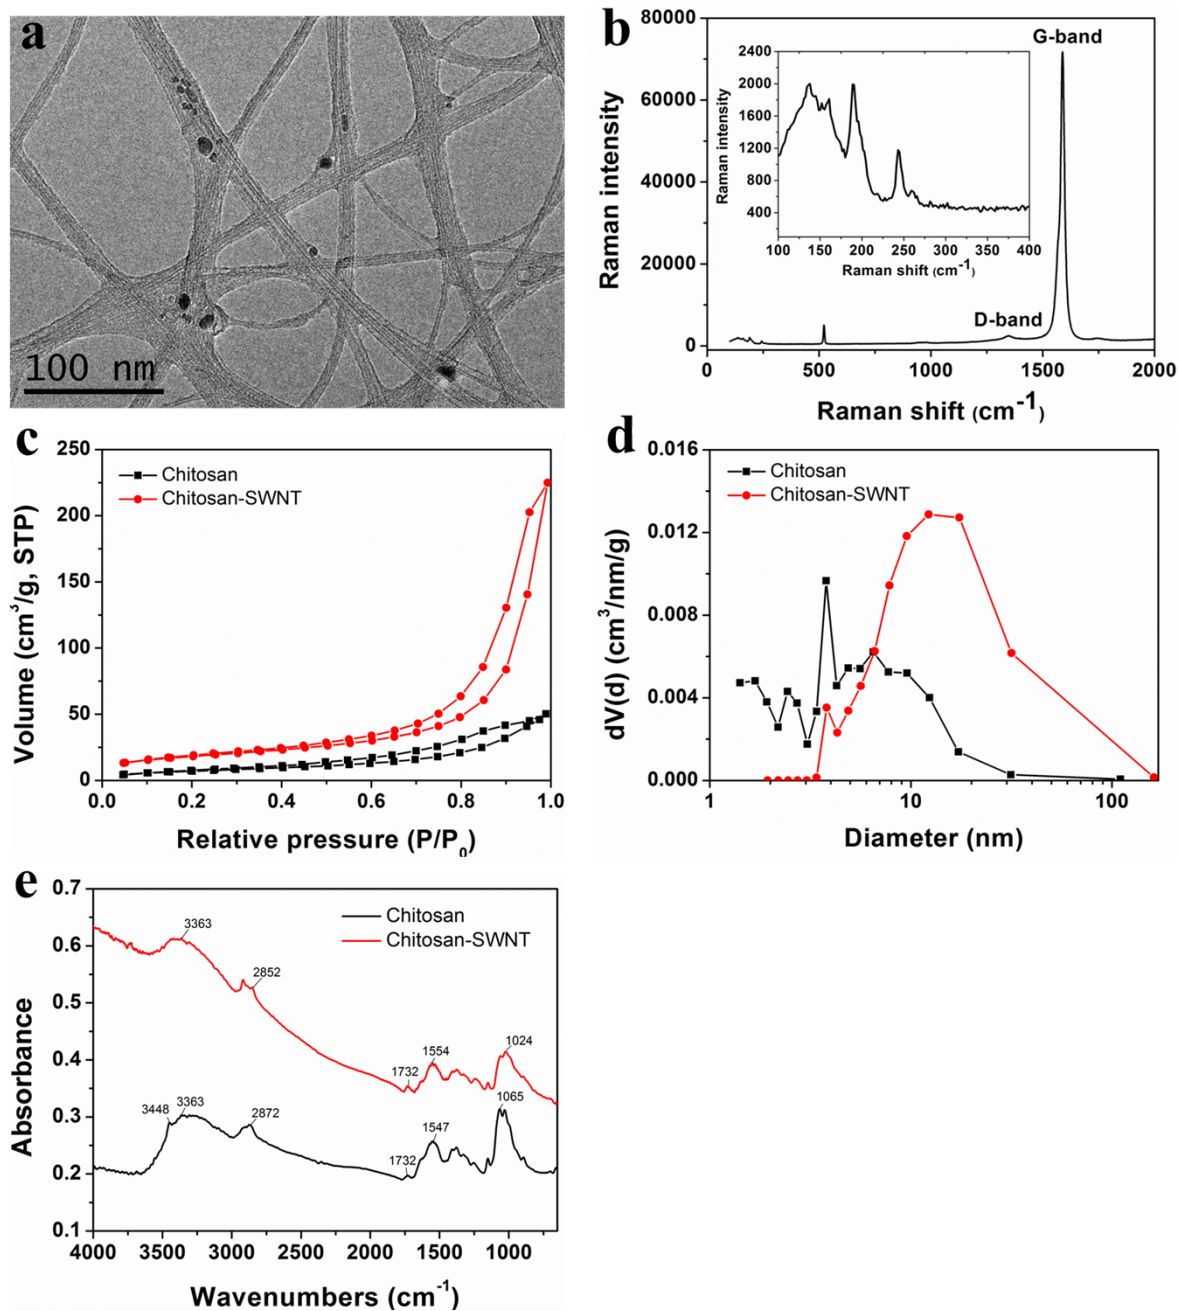

**Figure S2. More characterizations on chitosan beads and SWNT films.** a) High-resolution TEM image of the SWNT film after adsorption test showing interconnected single-walled nanotubes and small bundles. Black dots are adsorbed Au nanoparticles. b) Raman spectrum of the SWNT film, showing radial breathing mode peaks in 100 to 400  $\text{cm}^{-1}$ . c) Adsorption and desorption of nitrogen isotherms of the chitosan and chitosan-SWNT beads, respectively. d) Pore diameter distribution of the chitosan and chitosan-SWNT beads, respectively. e) FTIR spectra of the chitosan and chitosan-SWNT beads.
